# Supplementary material for: Concentration shift experiment with an electrode of active material for precise electrochemical analysis
Source: Royal Society of Chemistry journal article supplement (doi:10.1039/d3ra03630h), 2023-01-01
Supplement: d3ra03630h1.pdf [file d3ra03630h1.pdf]

*Electronic Supplementary Information (ESI)*

**Concentration shift experiment with electrode active material for precise electrochemical analysis**

Tamotsu Sawahashi, Koji Hiraoka, Shiro Seki\*

Graduate School of Applied Chemistry and Chemical Engineering, Kogakuin University, 2665-1  
Nakano-machi, Hachioji, Tokyo 192-0015, Japan

---

\* Corresponding author. Tel: +81-42-628-4568; fax: +81-42-628-4568.

E-mail: shiro-seki@cc.kogakuin.ac.jp (S. Seki)

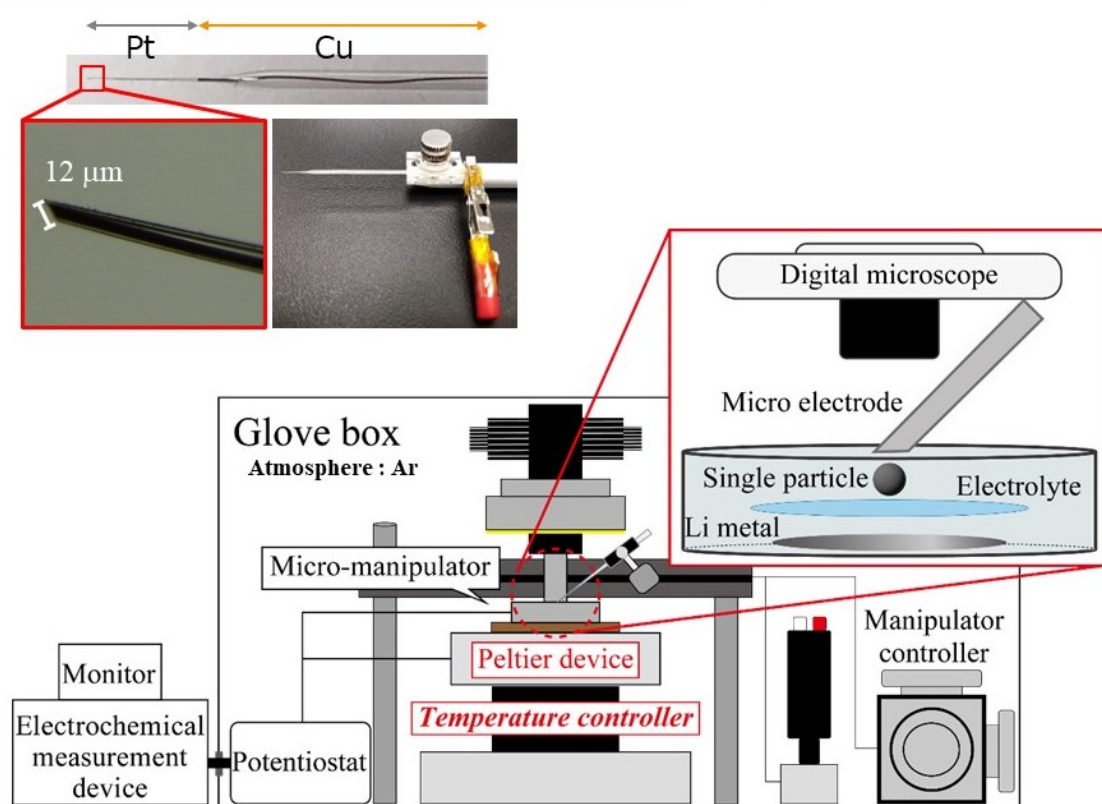

**Figure S1.** Schematic image of an SPEM cell used in this study.

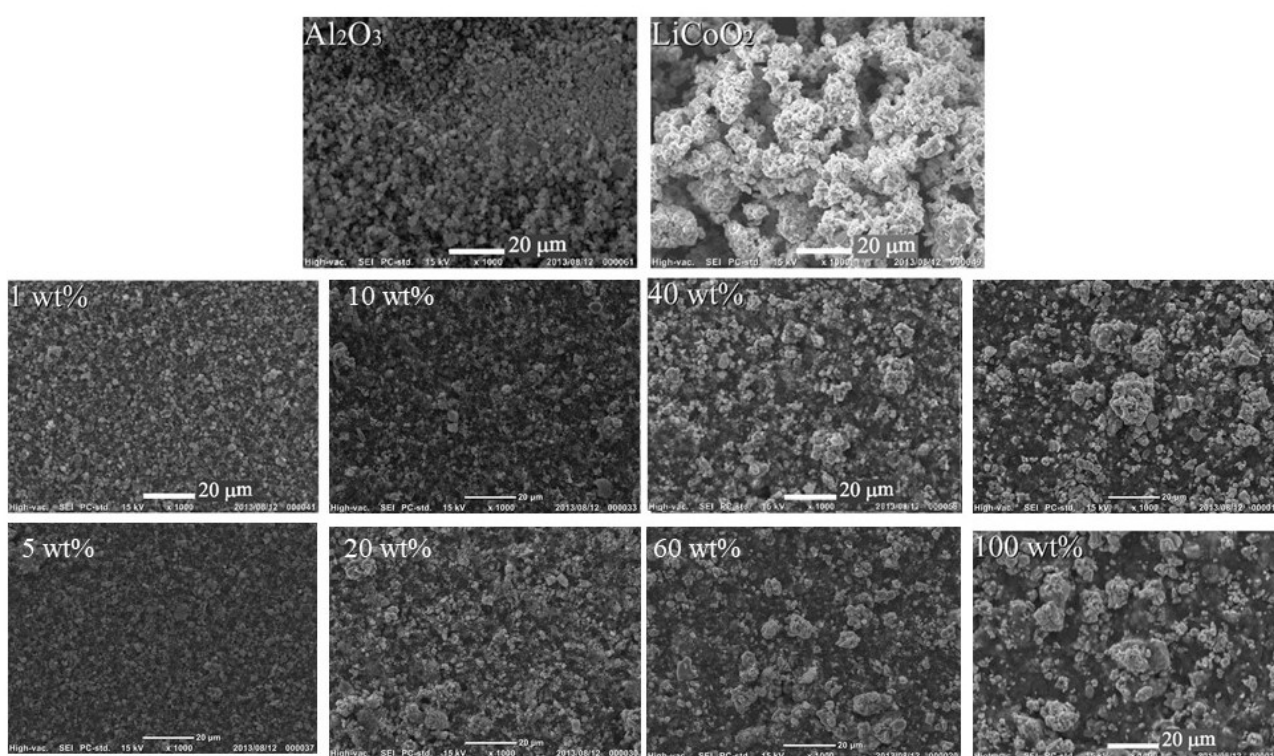

**Figure S2.** The SEM images of  $\text{LiCoO}_2$ ,  $\text{Al}_2\text{O}_3$  powder and surface of dilute-type applied positive electrode sheets.

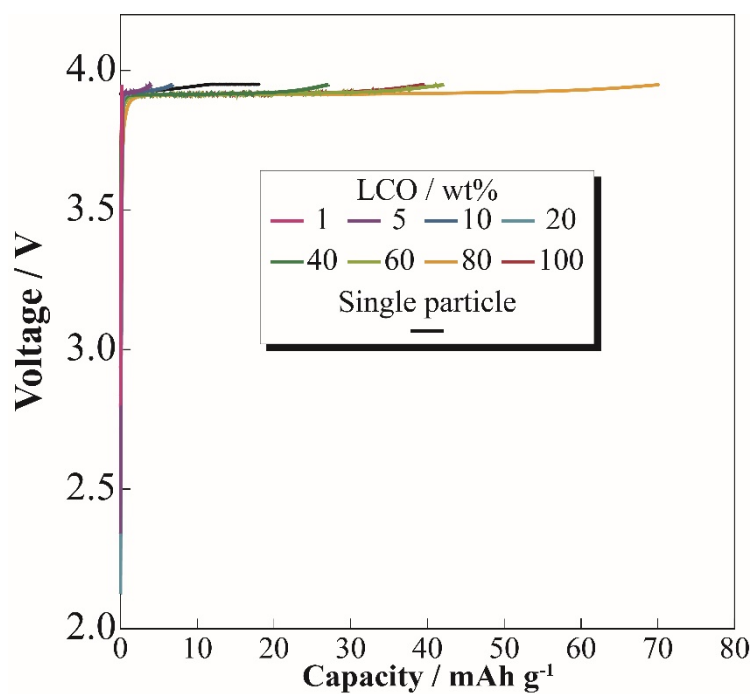

**Figure S3.** The charging curves of [Li|1.0 mol kg<sup>-1</sup> LiFSA / EC| LCO-Al<sub>2</sub>O<sub>3</sub>] cell using dilute-type applied positive electrode sheet for 3.95 V. Capacities were also calculated based on the sum weight of LCO and Al<sub>2</sub>O<sub>3</sub>.
